# Supplementary material for: SSRI versus SNRI Initiation and Incident Bipolar Disorder in Tertiary Psychiatric Care: An Active-Comparator Cohort Study from the United Arab Emirates
Source: Research Square preprint supplement (doi:10.21203/rs.3.rs-8580658/v1), 2026-01-19
Supplement: Supplementary file 1 [file 052e856118e580784ec15151.docx]

**Table S6. Drug-Level Sensitivity Analyses (Full Results)**

| **Comparison** | **Outcome** | **N Exp** | **N Comp** | **Events Exp** | **Events Comp** | **aHR (95% CI)** | **p** |
| --- | --- | --- | --- | --- | --- | --- | --- |
| Venlafaxine vs Sertraline | Tier 1 (Anchored) | 106 | 199 | 9 | 8 | 1.69 (0.61-4.70) | 0.32 |
| Venlafaxine vs Sertraline | Tier 2 (Confirmed) | 106 | 199 | 35 | 36 | 1.25 (0.77-2.04) | 0.37 |
| Venlafaxine vs Sertraline | Tier 3 (Any) | 106 | 199 | 47 | 69 | 0.97 (0.66-1.44) | 0.90 |
| Venlafaxine vs Escitalopram | Tier 1 (Anchored) | 106 | 373 | 9 | 29 | 1.17 (0.54-2.51) | 0.69 |
| Venlafaxine vs Escitalopram | Tier 2 (Confirmed) | 106 | 373 | 35 | 133 | 0.80 (0.55-1.17) | 0.25 |
| Venlafaxine vs Escitalopram | Tier 3 (Any) | 106 | 373 | 47 | 197 | 0.72 (0.52-0.99) | 0.04 |
| Duloxetine vs Sertraline | Tier 1 (Anchored) | 78 | 199 | 4 | 8 | 0.75 (0.21-2.65) | 0.66 |
| Duloxetine vs Sertraline | Tier 2 (Confirmed) | 78 | 199 | 21 | 36 | 1.19 (0.68-2.10) | 0.54 |
| Duloxetine vs Sertraline | Tier 3 (Any) | 78 | 199 | 39 | 69 | 1.28 (0.84-1.93) | 0.25 |
| Venlafaxine vs Pooled SSRIs | Tier 1 (Anchored) | 106 | 819 | 9 | 53 | 1.27 (0.62-2.60) | 0.52 |
| Venlafaxine vs Pooled SSRIs | Tier 2 (Confirmed) | 106 | 819 | 35 | 247 | 0.87 (0.61-1.25) | 0.46 |
| Venlafaxine vs Pooled SSRIs | Tier 3 (Any) | 106 | 819 | 47 | 378 | 0.79 (0.58-1.08) | 0.13 |
| Duloxetine vs Pooled SSRIs | Tier 1 (Anchored) | 78 | 819 | 4 | 53 | 0.87 (0.31-2.43) | 0.79 |
| Duloxetine vs Pooled SSRIs | Tier 2 (Confirmed) | 78 | 819 | 21 | 247 | 0.77 (0.49-1.21) | 0.26 |
| Duloxetine vs Pooled SSRIs | Tier 3 (Any) | 78 | 819 | 39 | 378 | 1.00 (0.72-1.39) | 0.99 |
| Desvenlafaxine vs Pooled SSRIs | Tier 1 (Anchored) | 92 | 819 | 6 | 53 | 0.82 (0.35-1.90) | 0.64 |
| Desvenlafaxine vs Pooled SSRIs | Tier 2 (Confirmed) | 92 | 819 | 25 | 247 | 0.70 (0.47-1.06) | 0.10 |
| Desvenlafaxine vs Pooled SSRIs | Tier 3 (Any) | 92 | 819 | 43 | 378 | 0.82 (0.60-1.13) | 0.23 |
| Sertraline vs Escitalopram | Tier 1 (Anchored) | 199 | 373 | 8 | 29 | 0.73 (0.33-1.64) | 0.45 |
| Sertraline vs Escitalopram | Tier 2 (Confirmed) | 199 | 373 | 36 | 133 | 0.60 (0.42-0.88) | 0.0086 |
| Sertraline vs Escitalopram | Tier 3 (Any) | 199 | 373 | 69 | 197 | 0.69 (0.53-0.92) | 0.01 |
| Fluoxetine vs Escitalopram | Tier 1 (Anchored) | 155 | 373 | 9 | 29 | 0.88 (0.41-1.90) | 0.75 |
| Fluoxetine vs Escitalopram | Tier 2 (Confirmed) | 155 | 373 | 34 | 133 | 0.76 (0.52-1.11) | 0.16 |
| Fluoxetine vs Escitalopram | Tier 3 (Any) | 155 | 373 | 59 | 197 | 0.72 (0.53-0.97) | 0.03 |
| Fluoxetine vs Sertraline | Tier 1 (Anchored) | 155 | 199 | 9 | 8 | 1.07 (0.40-2.87) | 0.90 |
| Fluoxetine vs Sertraline | Tier 2 (Confirmed) | 155 | 199 | 34 | 36 | 1.22 (0.76-1.95) | 0.42 |
| Fluoxetine vs Sertraline | Tier 3 (Any) | 155 | 199 | 59 | 69 | 0.97 (0.68-1.38) | 0.86 |
| Venlafaxine vs Duloxetine | Tier 1 (Anchored) | 106 | 78 | 9 | 4 | 1.70 (0.51-5.63) | 0.38 |
| Venlafaxine vs Duloxetine | Tier 2 (Confirmed) | 106 | 78 | 35 | 21 | 1.16 (0.67-2.00) | 0.60 |
| Venlafaxine vs Duloxetine | Tier 3 (Any) | 106 | 78 | 47 | 39 | 0.82 (0.53-1.27) | 0.38 |
| Venlafaxine vs Desvenlafaxine | Tier 1 (Anchored) | 106 | 92 | 9 | 6 | 1.63 (0.56-4.78) | 0.37 |
| Venlafaxine vs Desvenlafaxine | Tier 2 (Confirmed) | 106 | 92 | 35 | 25 | 1.23 (0.73-2.07) | 0.44 |
| Venlafaxine vs Desvenlafaxine | Tier 3 (Any) | 106 | 92 | 47 | 43 | 0.92 (0.60-1.39) | 0.69 |
| Venlafaxine vs Sertraline | Tier 1 (Anchored) | 41 | 87 | 7 | 6 | 2.28 (0.72-7.20) | 0.16 |
| Venlafaxine vs Sertraline | Tier 2 (Confirmed) | 41 | 87 | 12 | 16 | 1.30 (0.59-2.86) | 0.52 |
| Venlafaxine vs Sertraline | Tier 3 (Any) | 41 | 87 | 16 | 32 | 0.81 (0.43-1.54) | 0.52 |
| Venlafaxine vs Escitalopram | Tier 1 (Anchored) | 41 | 183 | 7 | 16 | 2.11 (0.86-5.16) | 0.10 |
| Venlafaxine vs Escitalopram | Tier 2 (Confirmed) | 41 | 183 | 12 | 59 | 0.90 (0.48-1.70) | 0.75 |
| Venlafaxine vs Escitalopram | Tier 3 (Any) | 41 | 183 | 16 | 89 | 0.70 (0.41-1.21) | 0.20 |
| Duloxetine vs Sertraline | Tier 1 (Anchored) | 36 | 87 | 3 | 6 | 0.99 (0.24-4.10) | 0.99 |
| Duloxetine vs Sertraline | Tier 2 (Confirmed) | 36 | 87 | 9 | 16 | 1.28 (0.55-2.99) | 0.56 |
| Duloxetine vs Sertraline | Tier 3 (Any) | 36 | 87 | 18 | 32 | 1.40 (0.76-2.59) | 0.28 |
| Venlafaxine vs Pooled SSRIs | Tier 1 (Anchored) | 41 | 388 | 7 | 30 | 2.16 (0.94-4.96) | 0.07 |
| Venlafaxine vs Pooled SSRIs | Tier 2 (Confirmed) | 41 | 388 | 12 | 113 | 0.86 (0.47-1.57) | 0.63 |
| Venlafaxine vs Pooled SSRIs | Tier 3 (Any) | 41 | 388 | 16 | 177 | 0.72 (0.43-1.21) | 0.21 |
| Duloxetine vs Pooled SSRIs | Tier 1 (Anchored) | 36 | 388 | 3 | 30 | 1.33 (0.40-4.39) | 0.65 |
| Duloxetine vs Pooled SSRIs | Tier 2 (Confirmed) | 36 | 388 | 9 | 113 | 0.98 (0.50-1.94) | 0.95 |
| Duloxetine vs Pooled SSRIs | Tier 3 (Any) | 36 | 388 | 18 | 177 | 1.25 (0.76-2.03) | 0.38 |
| Desvenlafaxine vs Pooled SSRIs | Tier 1 (Anchored) | 37 | 388 | 2 | 30 | 0.45 (0.11-1.92) | 0.28 |
| Desvenlafaxine vs Pooled SSRIs | Tier 2 (Confirmed) | 37 | 388 | 9 | 113 | 0.59 (0.30-1.18) | 0.14 |
| Desvenlafaxine vs Pooled SSRIs | Tier 3 (Any) | 37 | 388 | 17 | 177 | 0.77 (0.46-1.28) | 0.31 |
| Sertraline vs Escitalopram | Tier 1 (Anchored) | 87 | 183 | 6 | 16 | 1.15 (0.43-3.07) | 0.78 |
| Sertraline vs Escitalopram | Tier 2 (Confirmed) | 87 | 183 | 16 | 59 | 0.66 (0.38-1.15) | 0.14 |
| Sertraline vs Escitalopram | Tier 3 (Any) | 87 | 183 | 32 | 89 | 0.76 (0.51-1.15) | 0.19 |
| Fluoxetine vs Escitalopram | Tier 1 (Anchored) | 74 | 183 | 5 | 16 | 1.19 (0.42-3.35) | 0.74 |
| Fluoxetine vs Escitalopram | Tier 2 (Confirmed) | 74 | 183 | 16 | 59 | 0.84 (0.48-1.47) | 0.54 |
| Fluoxetine vs Escitalopram | Tier 3 (Any) | 74 | 183 | 29 | 89 | 0.80 (0.52-1.23) | 0.32 |
| Fluoxetine vs Sertraline | Tier 1 (Anchored) | 74 | 87 | 5 | 6 | 0.73 (0.20-2.65) | 0.63 |
| Fluoxetine vs Sertraline | Tier 2 (Confirmed) | 74 | 87 | 16 | 16 | 1.15 (0.56-2.36) | 0.70 |
| Fluoxetine vs Sertraline | Tier 3 (Any) | 74 | 87 | 29 | 32 | 0.95 (0.56-1.61) | 0.85 |
| Venlafaxine vs Duloxetine | Tier 1 (Anchored) | 41 | 36 | 7 | 3 | 2.05 (0.52-8.04) | 0.31 |
| Venlafaxine vs Duloxetine | Tier 2 (Confirmed) | 41 | 36 | 12 | 9 | 1.07 (0.43-2.62) | 0.89 |
| Venlafaxine vs Duloxetine | Tier 3 (Any) | 41 | 36 | 16 | 18 | 0.60 (0.29-1.23) | 0.16 |
| Venlafaxine vs Desvenlafaxine | Tier 1 (Anchored) | 41 | 37 | 7 | 2 | 6.04 (1.05-34.81) | 0.04 |
| Venlafaxine vs Desvenlafaxine | Tier 2 (Confirmed) | 41 | 37 | 12 | 9 | 1.57 (0.58-4.24) | 0.37 |
| Venlafaxine vs Desvenlafaxine | Tier 3 (Any) | 41 | 37 | 16 | 17 | 0.83 (0.39-1.77) | 0.64 |
| Venlafaxine vs Sertraline | Tier 1 (Anchored) | 56 | 129 | 7 | 6 | 2.33 (0.73-7.45) | 0.15 |
| Venlafaxine vs Sertraline | Tier 2 (Confirmed) | 56 | 129 | 16 | 19 | 1.57 (0.78-3.18) | 0.21 |
| Venlafaxine vs Sertraline | Tier 3 (Any) | 56 | 129 | 23 | 40 | 1.11 (0.65-1.91) | 0.70 |
| Venlafaxine vs Escitalopram | Tier 1 (Anchored) | 56 | 244 | 7 | 17 | 1.91 (0.78-4.66) | 0.15 |
| Venlafaxine vs Escitalopram | Tier 2 (Confirmed) | 56 | 244 | 16 | 81 | 0.76 (0.44-1.30) | 0.31 |
| Venlafaxine vs Escitalopram | Tier 3 (Any) | 56 | 244 | 23 | 119 | 0.72 (0.46-1.13) | 0.16 |
| Duloxetine vs Sertraline | Tier 1 (Anchored) | 48 | 129 | 3 | 6 | 0.99 (0.24-4.10) | 0.99 |
| Duloxetine vs Sertraline | Tier 2 (Confirmed) | 48 | 129 | 12 | 19 | 1.69 (0.77-3.71) | 0.19 |
| Duloxetine vs Sertraline | Tier 3 (Any) | 48 | 129 | 25 | 40 | 2.00 (1.15-3.48) | 0.01 |
| Venlafaxine vs Pooled SSRIs | Tier 1 (Anchored) | 56 | 528 | 7 | 31 | 2.06 (0.90-4.72) | 0.09 |
| Venlafaxine vs Pooled SSRIs | Tier 2 (Confirmed) | 56 | 528 | 16 | 150 | 0.79 (0.47-1.34) | 0.39 |
| Venlafaxine vs Pooled SSRIs | Tier 3 (Any) | 56 | 528 | 23 | 232 | 0.76 (0.49-1.17) | 0.22 |
| Duloxetine vs Pooled SSRIs | Tier 1 (Anchored) | 48 | 528 | 3 | 31 | 1.08 (0.33-3.58) | 0.90 |
| Duloxetine vs Pooled SSRIs | Tier 2 (Confirmed) | 48 | 528 | 12 | 150 | 0.71 (0.39-1.30) | 0.27 |
| Duloxetine vs Pooled SSRIs | Tier 3 (Any) | 48 | 528 | 25 | 232 | 1.15 (0.76-1.76) | 0.51 |
| Desvenlafaxine vs Pooled SSRIs | Tier 1 (Anchored) | 48 | 528 | 4 | 31 | 0.88 (0.30-2.57) | 0.82 |
| Desvenlafaxine vs Pooled SSRIs | Tier 2 (Confirmed) | 48 | 528 | 13 | 150 | 0.63 (0.35-1.11) | 0.11 |
| Desvenlafaxine vs Pooled SSRIs | Tier 3 (Any) | 48 | 528 | 23 | 232 | 0.86 (0.56-1.33) | 0.50 |
| Sertraline vs Escitalopram | Tier 1 (Anchored) | 129 | 244 | 6 | 17 | 0.94 (0.36-2.47) | 0.90 |
| Sertraline vs Escitalopram | Tier 2 (Confirmed) | 129 | 244 | 19 | 81 | 0.52 (0.31-0.86) | 0.01 |
| Sertraline vs Escitalopram | Tier 3 (Any) | 129 | 244 | 40 | 119 | 0.61 (0.42-0.87) | 0.0070 |
| Fluoxetine vs Escitalopram | Tier 1 (Anchored) | 97 | 244 | 4 | 17 | 0.92 (0.30-2.83) | 0.89 |
| Fluoxetine vs Escitalopram | Tier 2 (Confirmed) | 97 | 244 | 19 | 81 | 0.74 (0.45-1.22) | 0.24 |
| Fluoxetine vs Escitalopram | Tier 3 (Any) | 97 | 244 | 37 | 119 | 0.78 (0.53-1.14) | 0.20 |
| Fluoxetine vs Sertraline | Tier 1 (Anchored) | 97 | 129 | 4 | 6 | 0.82 (0.22-3.01) | 0.76 |
| Fluoxetine vs Sertraline | Tier 2 (Confirmed) | 97 | 129 | 19 | 19 | 1.56 (0.82-2.97) | 0.18 |
| Fluoxetine vs Sertraline | Tier 3 (Any) | 97 | 129 | 37 | 40 | 1.17 (0.74-1.85) | 0.51 |
| Venlafaxine vs Duloxetine | Tier 1 (Anchored) | 56 | 48 | 7 | 3 | 1.98 (0.50-7.78) | 0.33 |
| Venlafaxine vs Duloxetine | Tier 2 (Confirmed) | 56 | 48 | 16 | 12 | 1.15 (0.54-2.46) | 0.72 |
| Venlafaxine vs Duloxetine | Tier 3 (Any) | 56 | 48 | 23 | 25 | 0.68 (0.38-1.22) | 0.19 |
| Venlafaxine vs Desvenlafaxine | Tier 1 (Anchored) | 56 | 48 | 7 | 4 | 2.22 (0.61-8.04) | 0.23 |
| Venlafaxine vs Desvenlafaxine | Tier 2 (Confirmed) | 56 | 48 | 16 | 13 | 1.21 (0.56-2.63) | 0.63 |
| Venlafaxine vs Desvenlafaxine | Tier 3 (Any) | 56 | 48 | 23 | 23 | 0.86 (0.47-1.58) | 0.63 |
| Venlafaxine vs Sertraline | Tier 1 (Anchored) | 96 | 185 | 8 | 6 | 2.54 (0.83-7.80) | 0.10 |
| Venlafaxine vs Sertraline | Tier 2 (Confirmed) | 96 | 185 | 32 | 33 | 1.28 (0.76-2.13) | 0.35 |
| Venlafaxine vs Sertraline | Tier 3 (Any) | 96 | 185 | 42 | 62 | 0.99 (0.65-1.49) | 0.95 |
| Venlafaxine vs Escitalopram | Tier 1 (Anchored) | 96 | 335 | 8 | 24 | 1.27 (0.56-2.88) | 0.58 |
| Venlafaxine vs Escitalopram | Tier 2 (Confirmed) | 96 | 335 | 32 | 120 | 0.81 (0.54-1.20) | 0.30 |
| Venlafaxine vs Escitalopram | Tier 3 (Any) | 96 | 335 | 42 | 177 | 0.71 (0.50-1.00) | 0.05 |
| Duloxetine vs Sertraline | Tier 1 (Anchored) | 70 | 185 | 3 | 6 | 0.99 (0.24-4.10) | 0.99 |
| Duloxetine vs Sertraline | Tier 2 (Confirmed) | 70 | 185 | 19 | 33 | 1.27 (0.70-2.29) | 0.44 |
| Duloxetine vs Sertraline | Tier 3 (Any) | 70 | 185 | 34 | 62 | 1.27 (0.82-1.97) | 0.28 |
| Venlafaxine vs Pooled SSRIs | Tier 1 (Anchored) | 96 | 745 | 8 | 43 | 1.51 (0.70-3.27) | 0.29 |
| Venlafaxine vs Pooled SSRIs | Tier 2 (Confirmed) | 96 | 745 | 32 | 224 | 0.91 (0.63-1.33) | 0.63 |
| Venlafaxine vs Pooled SSRIs | Tier 3 (Any) | 96 | 745 | 42 | 340 | 0.81 (0.59-1.12) | 0.20 |
| Duloxetine vs Pooled SSRIs | Tier 1 (Anchored) | 70 | 745 | 3 | 43 | 0.80 (0.25-2.60) | 0.71 |
| Duloxetine vs Pooled SSRIs | Tier 2 (Confirmed) | 70 | 745 | 19 | 224 | 0.80 (0.50-1.29) | 0.36 |
| Duloxetine vs Pooled SSRIs | Tier 3 (Any) | 70 | 745 | 34 | 340 | 0.98 (0.69-1.40) | 0.92 |
| Desvenlafaxine vs Pooled SSRIs | Tier 1 (Anchored) | 84 | 745 | 6 | 43 | 0.99 (0.42-2.35) | 0.99 |
| Desvenlafaxine vs Pooled SSRIs | Tier 2 (Confirmed) | 84 | 745 | 24 | 224 | 0.78 (0.51-1.19) | 0.25 |
| Desvenlafaxine vs Pooled SSRIs | Tier 3 (Any) | 84 | 745 | 40 | 340 | 0.89 (0.64-1.25) | 0.51 |
| Sertraline vs Escitalopram | Tier 1 (Anchored) | 185 | 335 | 6 | 24 | 0.58 (0.23-1.45) | 0.24 |
| Sertraline vs Escitalopram | Tier 2 (Confirmed) | 185 | 335 | 33 | 120 | 0.59 (0.40-0.88) | 0.0090 |
| Sertraline vs Escitalopram | Tier 3 (Any) | 185 | 335 | 62 | 177 | 0.67 (0.50-0.90) | 0.0076 |
| Fluoxetine vs Escitalopram | Tier 1 (Anchored) | 139 | 335 | 7 | 24 | 0.84 (0.35-1.98) | 0.69 |
| Fluoxetine vs Escitalopram | Tier 2 (Confirmed) | 139 | 335 | 29 | 120 | 0.69 (0.46-1.04) | 0.08 |
| Fluoxetine vs Escitalopram | Tier 3 (Any) | 139 | 335 | 50 | 177 | 0.64 (0.46-0.88) | 0.0064 |
| Fluoxetine vs Sertraline | Tier 1 (Anchored) | 139 | 185 | 7 | 6 | 1.37 (0.45-4.20) | 0.58 |
| Fluoxetine vs Sertraline | Tier 2 (Confirmed) | 139 | 185 | 29 | 33 | 1.16 (0.70-1.91) | 0.57 |
| Fluoxetine vs Sertraline | Tier 3 (Any) | 139 | 185 | 50 | 62 | 0.89 (0.61-1.31) | 0.56 |
| Venlafaxine vs Duloxetine | Tier 1 (Anchored) | 96 | 70 | 8 | 3 | 2.28 (0.60-8.70) | 0.23 |
| Venlafaxine vs Duloxetine | Tier 2 (Confirmed) | 96 | 70 | 32 | 19 | 1.19 (0.66-2.13) | 0.57 |
| Venlafaxine vs Duloxetine | Tier 3 (Any) | 96 | 70 | 42 | 34 | 0.87 (0.55-1.38) | 0.56 |
| Venlafaxine vs Desvenlafaxine | Tier 1 (Anchored) | 96 | 84 | 8 | 6 | 1.50 (0.50-4.50) | 0.47 |
| Venlafaxine vs Desvenlafaxine | Tier 2 (Confirmed) | 96 | 84 | 32 | 24 | 1.12 (0.65-1.93) | 0.68 |
| Venlafaxine vs Desvenlafaxine | Tier 3 (Any) | 96 | 84 | 42 | 40 | 0.82 (0.53-1.26) | 0.36 |

*Abbreviations: aHR, adjusted hazard ratio; CI, confidence interval; Exp, exposed; Comp, comparator. All models adjusted for age, sex, schizophrenia spectrum disorder, substance use disorder, prior antipsychotic use, and prior SSRI/SNRI use.*
