# Supplementary material for: SSRI versus SNRI Initiation and Incident Bipolar Disorder in Tertiary Psychiatric Care: An Active-Comparator Cohort Study from the United Arab Emirates
Source: Research Square preprint supplement (doi:10.21203/rs.3.rs-8580658/v1), 2026-01-19
Supplement: Supplementary file 2 [file 4107567203e32fd3fbb00f82.docx]

**Table S3. Missing Data Assessment**

| **Variable** | **N Missing** | **% Missing** |
| --- | --- | --- |
| Antidepressant class (SSRI) | 0 | 0.0 |
| Age at index | 0 | 0.0 |
| Female sex | 0 | 0.0 |
| Schizophrenia spectrum disorder | 0 | 0.0 |
| Substance use disorder | 0 | 0.0 |
| Prior antipsychotic use | 0 | 0.0 |
| Prior SSRI/SNRI use | 0 | 0.0 |
| Tier 1 outcome (anchored) | 0 | 0.0 |
| Tier 1 follow-up time | 0 | 0.0 |
| Tier 2 outcome (confirmed) | 0 | 0.0 |
| Tier 2 follow-up time | 0 | 0.0 |
| Tier 3 outcome (any) | 0 | 0.0 |
| Tier 3 follow-up time | 0 | 0.0 |

*Note: Complete case analysis was used. All key analytic variables had no missing data among the 1,095 patients in the final cohort.*
