# Supplementary material for: SSRI versus SNRI Initiation and Incident Bipolar Disorder in Tertiary Psychiatric Care: An Active-Comparator Cohort Study from the United Arab Emirates
Source: Research Square preprint supplement (doi:10.21203/rs.3.rs-8580658/v1), 2026-01-19
Supplement: Supplementary file 3 [file 4b0e41517e273453bbd76fe8.docx]

Sex

Age

Schizophrenia Spectrum

Depression Severity*

**?**

**Antidepressant**

**Class (SSRI vs SNRI)**

**Incident Bipolar Disorder**

Genetic Liability*

Substance Use Disorder

Prior Antidepressant


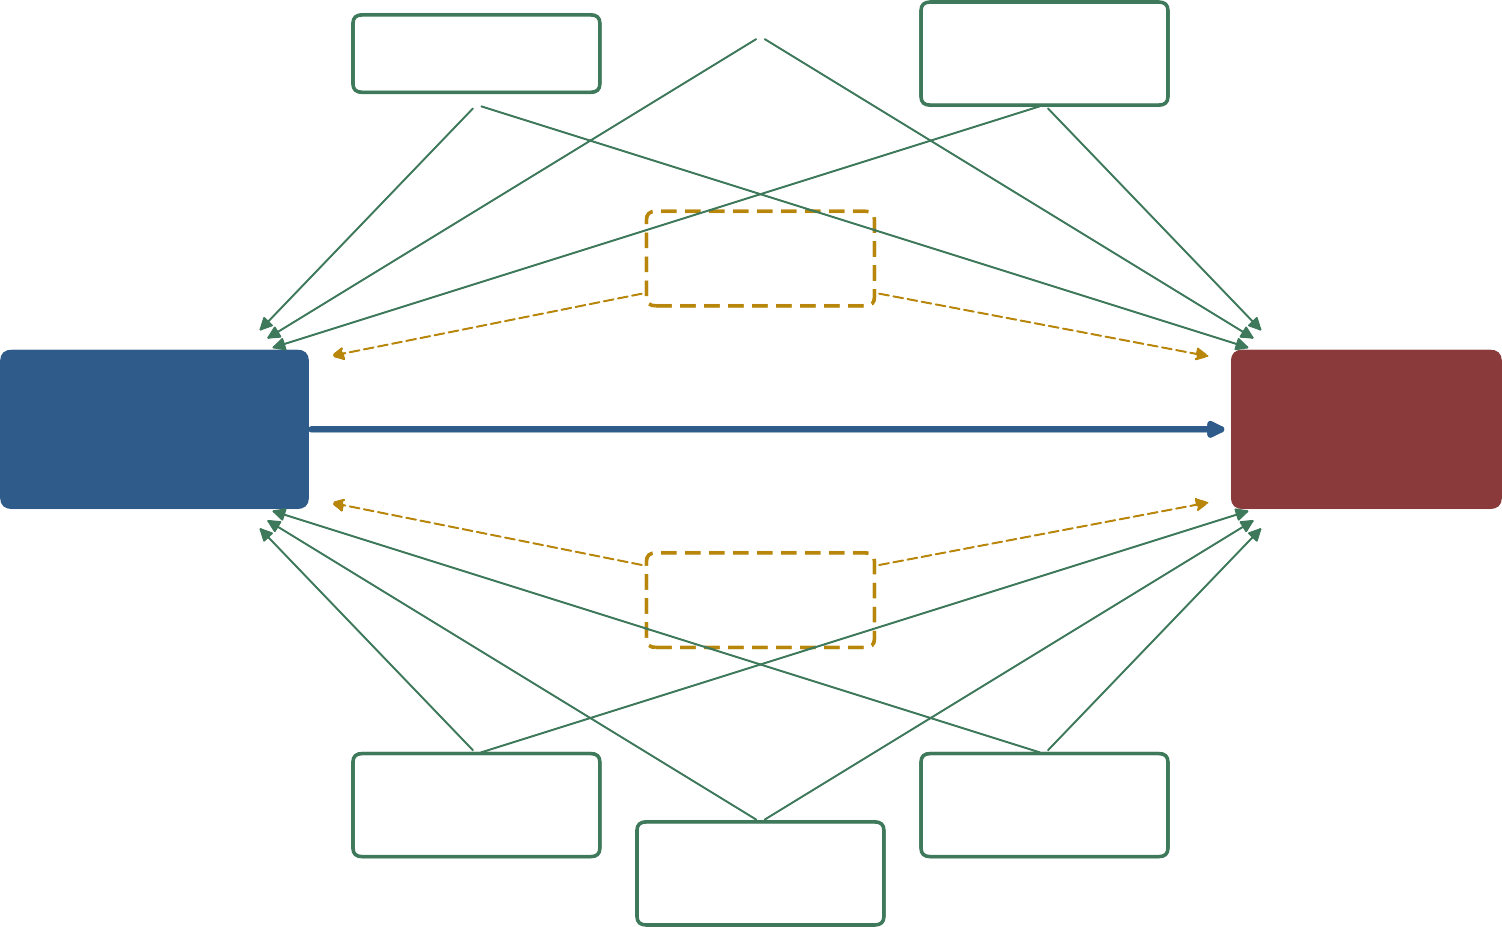


Prior Antipsychotic

Exposure
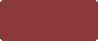
 Outcome
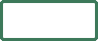
 Measured Confounder
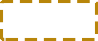
 Unmeasured Confounder*

**Unmeasured confounders represent potential sources of residual confounding*
