# Supplementary material for: SSRI versus SNRI Initiation and Incident Bipolar Disorder in Tertiary Psychiatric Care: An Active-Comparator Cohort Study from the United Arab Emirates
Source: Research Square preprint supplement (doi:10.21203/rs.3.rs-8580658/v1), 2026-01-19
Supplement: Supplementary file 4 [file 4d47d2eb94dc490d68d6cd0c.docx]

**Table S2. Inverse Probability of Treatment-Weighted Analysis Results**

| **Outcome** | **Model** | **HR (95% CI)** | **p value** |
| --- | --- | --- | --- |
| Tier 1: Anchored bipolar disorder | Covariate adjusted | 1.07 (0.63–1.84) | 0.80 |
|  | IPTW (stabilised) | 1.02 (0.87–1.21) | 0.78 |
| Tier 2: Confirmed bipolar disorder | Covariate adjusted | 1.24 (0.96–1.60) | 0.10 |
|  | IPTW (stabilised) | 1.23 (1.13–1.33) | <0.001 |
| Tier 3: Any bipolar diagnosis | Covariate adjusted | 1.12 (0.92–1.37) | 0.27 |
|  | IPTW (stabilised) | 1.11 (1.04–1.18) | 0.002 |

*Abbreviations: HR, hazard ratio; CI, confidence interval; IPTW, inverse probability of treatment weighting. HRs represent SNRI versus SSRI (SSRI as reference). Covariate-adjusted models included age, sex, schizophrenia spectrum disorder, substance use disorder, prior antipsychotic use, and prior SSRI/SNRI use. IPTW models used stabilised weights truncated at the 1st and 99th percentiles. Tier 1 = anchored bipolar disorder (≥2 diagnoses ≥30 days apart + mood stabiliser initiation); Tier 2 = confirmed bipolar disorder (≥2 diagnoses ≥30 days apart); Tier 3 = any bipolar diagnosis (≥1 diagnosis).*
