# Supplementary material for: SSRI versus SNRI Initiation and Incident Bipolar Disorder in Tertiary Psychiatric Care: An Active-Comparator Cohort Study from the United Arab Emirates
Source: Research Square preprint supplement (doi:10.21203/rs.3.rs-8580658/v1), 2026-01-19
Supplement: Supplementary file 5 [file 508cfcd000a5a73cf46bb3f2.docx]

**Table S1. Covariate Balance Before and After Inverse Probability of Treatment Weighting**

| **Covariate** | **SMD (Raw)** | **SMD (IPTW)** |
| --- | --- | --- |
| Age (years) | 0.31 | 0.03 |
| Female sex | 0.11 | 0.02 |
| Schizophrenia spectrum disorder | 0.17 | 0.02 |
| Substance use disorder | 0.14 | 0.01 |
| Prior antipsychotic use | 0.10 | 0.02 |
| Prior SSRI/SNRI use | 0.11 | 0.01 |

*Abbreviations: SMD, standardised mean difference; IPTW, inverse probability of treatment weighting; SSRI, selective serotonin reuptake inhibitor; SNRI, serotonin-norepinephrine reuptake inhibitor. SMD < 0.10 generally indicates adequate balance. Propensity scores were estimated using logistic regression with all covariates. Stabilised weights were applied with truncation at the 1st and 99th percentiles.*
