# Supplementary material for: SSRI versus SNRI Initiation and Incident Bipolar Disorder in Tertiary Psychiatric Care: An Active-Comparator Cohort Study from the United Arab Emirates
Source: Research Square preprint supplement (doi:10.21203/rs.3.rs-8580658/v1), 2026-01-19
Supplement: Supplementary file 6 [file 68648e6c332c37d437577339.docx]

**Table S5. ICD-10 Diagnostic Codes and Medication Codes**

| **Category** | **Code** | **Description** | **Type** |
| --- | --- | --- | --- |
| Index Condition (Depression) | F32 | Major depressive disorder, single episode | ICD-10 |
| Index Condition (Depression) | F32.0 | Major depressive disorder, single episode, mild | ICD-10 |
| Index Condition (Depression) | F32.1 | Major depressive disorder, single episode, moderate | ICD-10 |
| Index Condition (Depression) | F32.2 | Major depressive disorder, single episode, severe without psychotic features | ICD-10 |
| Index Condition (Depression) | F32.3 | Major depressive disorder, single episode, severe with psychotic features | ICD-10 |
| Index Condition (Depression) | F32.4 | Major depressive disorder, single episode, in partial remission | ICD-10 |
| Index Condition (Depression) | F32.5 | Major depressive disorder, single episode, in full remission | ICD-10 |
| Index Condition (Depression) | F32.8 | Other depressive episodes | ICD-10 |
| Index Condition (Depression) | F32.9 | Major depressive disorder, single episode, unspecified | ICD-10 |
| Index Condition (Depression) | F33 | Major depressive disorder, recurrent | ICD-10 |
| Index Condition (Depression) | F33.0 | Major depressive disorder, recurrent, mild | ICD-10 |
| Index Condition (Depression) | F33.1 | Major depressive disorder, recurrent, moderate | ICD-10 |
| Index Condition (Depression) | F33.2 | Major depressive disorder, recurrent, severe without psychotic features | ICD-10 |
| Index Condition (Depression) | F33.3 | Major depressive disorder, recurrent, severe with psychotic features | ICD-10 |
| Index Condition (Depression) | F33.4 | Major depressive disorder, recurrent, in remission | ICD-10 |
| Index Condition (Depression) | F33.8 | Other recurrent depressive disorders | ICD-10 |
| Index Condition (Depression) | F33.9 | Major depressive disorder, recurrent, unspecified | ICD-10 |
| Index Condition (Depression) | F34.1 | Dysthymic disorder | ICD-10 |
| Index Condition (Depression) | F41.2 | Mixed anxiety and depressive disorder | ICD-10 |
| Outcome (Bipolar Disorder) | F30 | Manic episode | ICD-10 |
| Outcome (Bipolar Disorder) | F30.0 | Manic episode, hypomania | ICD-10 |
| Outcome (Bipolar Disorder) | F30.1 | Manic episode, without psychotic symptoms | ICD-10 |
| Outcome (Bipolar Disorder) | F30.2 | Manic episode, severe with psychotic symptoms | ICD-10 |
| Outcome (Bipolar Disorder) | F30.8 | Other manic episodes | ICD-10 |
| Outcome (Bipolar Disorder) | F30.9 | Manic episode, unspecified | ICD-10 |
| Outcome (Bipolar Disorder) | F31 | Bipolar disorder | ICD-10 |
| Outcome (Bipolar Disorder) | F31.0 | Bipolar disorder, current episode hypomanic | ICD-10 |
| Outcome (Bipolar Disorder) | F31.1 | Bipolar disorder, current episode manic without psychotic features | ICD-10 |
| Outcome (Bipolar Disorder) | F31.2 | Bipolar disorder, current episode manic with psychotic features | ICD-10 |
| Outcome (Bipolar Disorder) | F31.3 | Bipolar disorder, current episode depressed, mild or moderate | ICD-10 |
| Outcome (Bipolar Disorder) | F31.4 | Bipolar disorder, current episode depressed, severe without psychotic features | ICD-10 |
| Outcome (Bipolar Disorder) | F31.5 | Bipolar disorder, current episode depressed, severe with psychotic features | ICD-10 |
| Outcome (Bipolar Disorder) | F31.6 | Bipolar disorder, current episode mixed | ICD-10 |
| Outcome (Bipolar Disorder) | F31.7 | Bipolar disorder, currently in remission | ICD-10 |
| Outcome (Bipolar Disorder) | F31.8 | Other bipolar disorders | ICD-10 |
| Outcome (Bipolar Disorder) | F31.9 | Bipolar disorder, unspecified | ICD-10 |
| Baseline Schizophrenia Spectrum | F20 | Schizophrenia | ICD-10 |
| Baseline Schizophrenia Spectrum | F20.0-F20.9 | All schizophrenia subtypes | ICD-10 |
| Baseline Schizophrenia Spectrum | F21 | Schizotypal disorder | ICD-10 |
| Baseline Schizophrenia Spectrum | F22 | Delusional disorders | ICD-10 |
| Baseline Schizophrenia Spectrum | F23 | Brief psychotic disorder | ICD-10 |
| Baseline Schizophrenia Spectrum | F24 | Shared psychotic disorder | ICD-10 |
| Baseline Schizophrenia Spectrum | F25 | Schizoaffective disorder | ICD-10 |
| Baseline Schizophrenia Spectrum | F28 | Other psychotic disorder not due to a substance | ICD-10 |
| Baseline Schizophrenia Spectrum | F29 | Unspecified psychosis | ICD-10 |
| Baseline Substance Use Disorder | F10 | Alcohol-related disorders | ICD-10 |
| Baseline Substance Use Disorder | F11 | Opioid-related disorders | ICD-10 |
| Baseline Substance Use Disorder | F12 | Cannabis-related disorders | ICD-10 |
| Baseline Substance Use Disorder | F13 | Sedative, hypnotic, or anxiolytic-related disorders | ICD-10 |
| Baseline Substance Use Disorder | F14 | Cocaine-related disorders | ICD-10 |
| Baseline Substance Use Disorder | F15 | Other stimulant-related disorders | ICD-10 |
| Baseline Substance Use Disorder | F16 | Hallucinogen-related disorders | ICD-10 |
| Baseline Substance Use Disorder | F17 | Nicotine dependence | ICD-10 |
| Baseline Substance Use Disorder | F18 | Inhalant-related disorders | ICD-10 |
| Baseline Substance Use Disorder | F19 | Other psychoactive substance-related disorders | ICD-10 |
| Baseline Anxiety Disorder | F40 | Phobic anxiety disorders | ICD-10 |
| Baseline Anxiety Disorder | F41 | Other anxiety disorders | ICD-10 |
| Baseline Anxiety Disorder | F41.0 | Panic disorder | ICD-10 |
| Baseline Anxiety Disorder | F41.1 | Generalized anxiety disorder | ICD-10 |
| Baseline Anxiety Disorder | F42 | Obsessive-compulsive disorder | ICD-10 |
| Baseline Anxiety Disorder | F43 | Reaction to severe stress, and adjustment disorders | ICD-10 |
| Exposure - SSRI | Sertraline | 50 mg | Medication |
| Exposure - SSRI | Escitalopram | 10 mg | Medication |
| Exposure - SSRI | Fluoxetine | 20 mg | Medication |
| Exposure - SSRI | Paroxetine | 20 mg | Medication |
| Exposure - SSRI | Citalopram | 20 mg | Medication |
| Exposure - SSRI | Fluvoxamine | 100 mg | Medication |
| Exposure - SNRI | Venlafaxine | 100 mg | Medication |
| Exposure - SNRI | Duloxetine | 60 mg | Medication |
| Exposure - SNRI | Desvenlafaxine | 50 mg | Medication |
| Mood Stabilizer (Tier 1 Anchor) | Lithium | All formulations | Medication |
| Mood Stabilizer (Tier 1 Anchor) | Valproate/Valproic acid | Including divalproex | Medication |
| Mood Stabilizer (Tier 1 Anchor) | Carbamazepine | All formulations | Medication |
| Mood Stabilizer (Tier 1 Anchor) | Lamotrigine | All formulations | Medication |
| Antipsychotic (Prior Use Covariate) | Aripiprazole | SGA | Medication |
| Antipsychotic (Prior Use Covariate) | Olanzapine | SGA | Medication |
| Antipsychotic (Prior Use Covariate) | Quetiapine | SGA | Medication |
| Antipsychotic (Prior Use Covariate) | Risperidone | SGA | Medication |
| Antipsychotic (Prior Use Covariate) | Paliperidone | SGA | Medication |
| Antipsychotic (Prior Use Covariate) | Ziprasidone | SGA | Medication |
| Antipsychotic (Prior Use Covariate) | Lurasidone | SGA | Medication |
| Antipsychotic (Prior Use Covariate) | Clozapine | SGA | Medication |
| Antipsychotic (Prior Use Covariate) | Amisulpride | SGA | Medication |
| Antipsychotic (Prior Use Covariate) | Haloperidol | FGA | Medication |
| Antipsychotic (Prior Use Covariate) | Chlorpromazine | FGA | Medication |
| Antipsychotic (Prior Use Covariate) | Fluphenazine | FGA | Medication |

*Abbreviations: ICD-10, International Classification of Diseases, 10th Revision.*
