# Supplementary material for: SSRI versus SNRI Initiation and Incident Bipolar Disorder in Tertiary Psychiatric Care: An Active-Comparator Cohort Study from the United Arab Emirates
Source: Research Square preprint supplement (doi:10.21203/rs.3.rs-8580658/v1), 2026-01-19
Supplement: Supplementary file 7 [file c51bdbfdb63006e63df22873.docx]

**Table S4. Full Model Coefficients for All Covariates Across Outcome Tiers**

| **Variable** | **Tier 1 aHR (95% CI)** | **p** | **Tier 2 aHR (95% CI)** | **p** | **Tier 3 aHR (95% CI)** | **p** |
| --- | --- | --- | --- | --- | --- | --- |
| SSRI (vs SNRI) | 1.07 (0.63-1.84) | 0.80 | 1.24 (0.96-1.60) | 0.10 | 1.12 (0.92-1.37) | 0.27 |
| Age (per year) | 0.97 (0.95-0.99) | 0.02 | 1.02 (1.01-1.03) | 0.0008 | 1.01 (1.01-1.02) | 0.0006 |
| Female sex | 1.26 (0.78-2.02) | 0.34 | 1.14 (0.91-1.42) | 0.26 | 1.08 (0.90-1.29) | 0.40 |
| Schizophrenia spectrum | 0.96 (0.54-1.70) | 0.88 | 0.94 (0.73-1.22) | 0.65 | 0.99 (0.81-1.22) | 0.93 |
| Substance use disorder | 1.62 (0.90-2.92) | 0.11 | 1.28 (0.99-1.66) | 0.06 | 1.35 (1.10-1.67) | 0.00 |
| Prior antipsychotic use | 1.58 (0.86-2.89) | 0.14 | 1.03 (0.80-1.34) | 0.82 | 1.03 (0.83-1.27) | 0.79 |
| Prior SSRI/SNRI use | 0.42 (0.23-0.76) | 0.00 | 1.00 (0.75-1.34) | 0.99 | 0.95 (0.76-1.19) | 0.66 |

*Abbreviations: aHR, adjusted hazard ratio; CI, confidence interval. Tier 1 = anchored bipolar disorder (≥2 diagnoses ≥30 days apart + mood stabiliser); Tier 2 = confirmed bipolar disorder (≥2 diagnoses ≥30 days apart); Tier 3 = any bipolar diagnosis (≥1 diagnosis).*
