# Supplementary material for: SSRI versus SNRI Initiation and Incident Bipolar Disorder in Tertiary Psychiatric Care: An Active-Comparator Cohort Study from the United Arab Emirates
Source: Research Square preprint supplement (doi:10.21203/rs.3.rs-8580658/v1), 2026-01-19
Supplement: Supplementary file 8 [file cfe53d6e9eebfce6e2c3b1ed.docx]

# Figure S2. Study Design: 90-Day Landmark Active-Comparator Cohort

(90 days) (Time-to-event analysis)

Exposure Classification Window Outcome Ascertainment

Index Date

*(First AD dispensing)*

Day 90

*(Landmark / Cohort Entry)*

End of Follow-up

*(Event, death,*


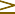

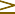


*or Dec 2025)*

**Primary Outcome**

Anchored Bipolar Disorder

*2 diagnoses 30 days apart*

*+ mood stabiliser initiation*

**Events: n = 72 (6.6%)**

**SSRI Initiators**

n = 818

*(Reference group)*

**SNRI Initiators**

n = 277

*(Comparator group)*

**Key Design Features**

Active-comparator design minimises confounding by indication

Landmark analysis eliminates immortal time bias

ITT: exposure fixed at Day 90
