# Supplementary material for: SSRI versus SNRI Initiation and Incident Bipolar Disorder in Tertiary Psychiatric Care: An Active-Comparator Cohort Study from the United Arab Emirates
Source: Research Square preprint supplement (doi:10.21203/rs.3.rs-8580658/v1), 2026-01-19
Supplement: Supplementary file 9 [file e6a27bf3a12fdf17378f6a5e.docx]

**Table S7. Additional Drug-Level Head-to-Head Comparisons**

| **Comparison** | **Outcome** | **N Exp** | **N Comp** | **Events Exp** | **Events Comp** | **aHR (95% CI)** | **p** |
| --- | --- | --- | --- | --- | --- | --- | --- |
| Fluox vs Escit | Tier 1 | 155 | 373 | 9 | 29 | 0.88 (0.41-1.90) | 0.75 |
| Fluox vs Escit | Tier 2 | 155 | 373 | 34 | 133 | 0.76 (0.52-1.11) | 0.16 |
| Fluox vs Escit | Tier 3 | 155 | 373 | 59 | 197 | 0.72 (0.53-0.97) | 0.03 |
| Fluox vs Sert | Tier 1 | 155 | 199 | 9 | 8 | 1.07 (0.40-2.87) | 0.90 |
| Fluox vs Sert | Tier 2 | 155 | 199 | 34 | 36 | 1.22 (0.76-1.95) | 0.42 |
| Fluox vs Sert | Tier 3 | 155 | 199 | 59 | 69 | 0.97 (0.68-1.38) | 0.86 |
| Fluox vs Other SSRIs | Tier 1 | 155 | 664 | 9 | 44 | 1.03 (0.50-2.13) | 0.93 |
| Fluox vs Other SSRIs | Tier 2 | 155 | 664 | 34 | 213 | 0.82 (0.57-1.18) | 0.28 |
| Fluox vs Other SSRIs | Tier 3 | 155 | 664 | 59 | 319 | 0.77 (0.58-1.02) | 0.07 |
| Venla vs Dulox | Tier 1 | 106 | 78 | 9 | 4 | 1.70 (0.51-5.63) | 0.38 |
| Venla vs Dulox | Tier 2 | 106 | 78 | 35 | 21 | 1.16 (0.67-2.00) | 0.60 |
| Venla vs Dulox | Tier 3 | 106 | 78 | 47 | 39 | 0.82 (0.53-1.27) | 0.37 |
| Venla vs Desven | Tier 1 | 106 | 92 | 9 | 6 | 1.63 (0.56-4.78) | 0.37 |
| Venla vs Desven | Tier 2 | 106 | 92 | 35 | 25 | 1.23 (0.73-2.07) | 0.44 |
| Venla vs Desven | Tier 3 | 106 | 92 | 47 | 43 | 0.92 (0.60-1.39) | 0.69 |
| Dulox vs Escit | Tier 1 | 78 | 373 | 4 | 29 | 0.85 (0.30-2.46) | 0.77 |
| Dulox vs Escit | Tier 2 | 78 | 373 | 21 | 133 | 0.72 (0.45-1.15) | 0.17 |
| Dulox vs Escit | Tier 3 | 78 | 373 | 39 | 197 | 0.90 (0.64-1.28) | 0.57 |
| Desven vs Escit | Tier 1 | 92 | 373 | 6 | 29 | 0.77 (0.32-1.86) | 0.55 |
| Desven vs Escit | Tier 2 | 92 | 373 | 25 | 133 | 0.64 (0.42-0.99) | 0.04 |
| Desven vs Escit | Tier 3 | 92 | 373 | 43 | 197 | 0.75 (0.54-1.05) | 0.10 |
| Desven vs Sert | Tier 1 | 92 | 199 | 6 | 8 | 0.79 (0.25-2.50) | 0.69 |
| Desven vs Sert | Tier 2 | 92 | 199 | 25 | 36 | 1.00 (0.59-1.70) | 0.99 |
| Desven vs Sert | Tier 3 | 92 | 199 | 43 | 69 | 0.98 (0.66-1.47) | 0.93 |

*Abbreviations: aHR, adjusted hazard ratio; CI, confidence interval; Exp, exposed; Comp, comparator; Fluox, fluoxetine; Escit, escitalopram; Sert, sertraline. All models adjusted for age, sex, schizophrenia spectrum disorder, substance use disorder, prior antipsychotic use, and prior SSRI/SNRI use. These exploratory analyses were not corrected for multiple comparisons.*
