# Supplementary material for: SSRI versus SNRI Initiation and Incident Bipolar Disorder in Tertiary Psychiatric Care: An Active-Comparator Cohort Study from the United Arab Emirates
Source: Research Square preprint supplement (doi:10.21203/rs.3.rs-8580658/v1), 2026-01-19
Supplement: Supplementary file 10 [file f1352c676ed1bb7e7fb9b323.docx]

# Figure S1. Patient Flow Diagram

General Adult Psychiatry Patients 2018 2025

(N = 14,583)

Excluded (n = 10,417)

|  |  |  |
| --- | --- | --- |
|  |
| Patients with Qualifying Depression Diagnosis (N = 4,166) | | |

- *No qualifying depression diagnosis*


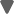

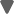

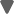

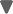

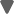

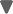

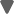


Patients with SSRI/SNRI Initiated

in Exposure Window (N = 2,024)

**Final Analytic Cohort**

(N = 1,095)

**SSRI Initiators**

(n = 818, 74.7%)

**SNRI Initiators**

(n = 277, 25.3%)

Tier 1 (Anchored): 54

Tier 1 (Anchored): 18

Tier 2 (Confirmed): 246

Tier 2 (Confirmed): 82

Tier 3 (Any): 375

Tier 3 (Any): 132

Excluded (n = 2,142)

- *No SSRI/SNRI in 90-day window*
- *No encounter after landmark*

Excluded (n = 929)

- *Bipolar diagnosis (F30/F31) before landmark*

Median follow-up: 0.90 years (IQR 0.31
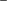
2.21)
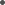
 Total person-years: 1,610.6
